# Supplementary figures and images for: A sustainable anode for Na-ion batteries based on holm oak waste-derived hard carbon and lignin binder
Source: Royal Society of Chemistry journal article supplement (doi:10.1039/d5se00645g), 2025-01-01

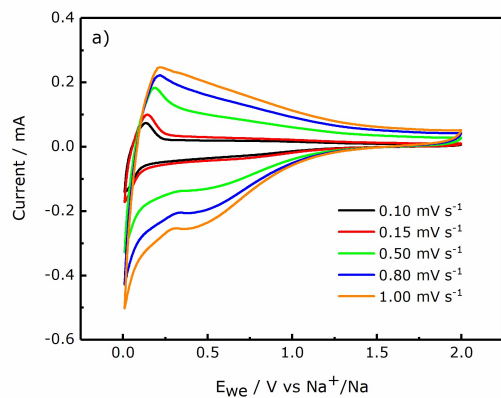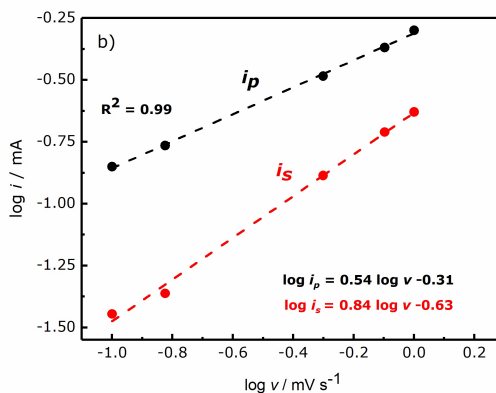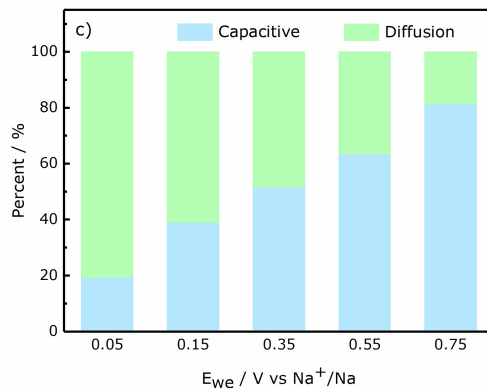

Supplement: d5se00645g1.pdf [file d5se00645g1.pdf]
